# Supplementary material for: Mid-life leukocyte telomere length and dementia risk: a prospective cohort study of 435,046 UK Biobank participants
Source: bioRxiv or medRxiv preprint supplement (doi:10.1101/2022.06.30.22277121), 2022-07-20
Supplement: Supplementary file [file media-1.pdf]

Supplementary Online Content

Mid-life leukocyte telomere length and dementia risk: a prospective cohort study of 435,046 UK Biobank participants

Supplement 1

Table 1 Genetic instruments selected for Mendelian randomization analyses

Modified table based on Supplementary Table 1 of Codd et al. (Nature Genetics 2021)

A1 is the effect allele, A2 the other allele

N\_imp is the sample size multiplied by the imputation quality to indicate approximate sample size for the test.

Beta is the estimated mean standard deviation change in leukocyte telomere length per copy increase in the effect allele.

SE is the standard error of beta.

F=(Beta/SE)<sup>2</sup>

%var explained is the percent of variance explained by a particular genetic variant.

| Chr | Genetic Variant  | BP GRCh37   | GENE          | A1 | A2 | N_imp   | FREQ(A1) | Beta  | SE    | Uncorrected for the winner's curse |         |                | Corrected for the winner's curse |      |         |                |
|-----|------------------|-------------|---------------|----|----|---------|----------|-------|-------|------------------------------------|---------|----------------|----------------------------------|------|---------|----------------|
|     |                  |             |               |    |    |         |          |       |       | Pvalue                             | F       | %var explained | Beta                             | SE   | F       | %var explained |
| 1   | rs187540244      | 11,224,327  | EXOSC10       | G  | A  | 455,136 | 0.995    | 0.091 | 0.015 | 1.2E-09                            | 36.55   | 0.008          | 0.04                             | 0.06 | 0.55    | 0.000          |
| 1   | rs66731853       | 20,916,238  | CDA           | G  | A  | 463,432 | 0.683    | 0.018 | 0.002 | 1.5E-16                            | 77.79   | 0.017          | 0.02                             | 0.00 | 76.32   | 0.016          |
| 1   | rs17185038       | 28,219,658  | RP2           | C  | G  | 464,716 | 0.935    | 0.026 | 0.004 | 2.1E-10                            | 40.58   | 0.009          | 0.02                             | 0.01 | 6.59    | 0.001          |
| 1   | rs6669563        | 32,279,629  | SPOCD1        | A  | G  | 464,716 | 0.562    | 0.018 | 0.002 | 2.1E-19                            | 77.79   | 0.017          | 0.02                             | 0.00 | 76.32   | 0.016          |
| 1   | 1-41236837_CT_C  | 41,236,837  | NFYC          | A  | CT | 458,273 | 0.775    | 0.015 | 0.002 | 1.7E-09                            | 42.68   | 0.009          | 0.01                             | 0.00 | 11.31   | 0.002          |
| 1   | rs41269079       | 45,252,015  | BEST4         | C  | T  | 464,215 | 0.811    | 0.015 | 0.003 | 1.7E-09                            | 34.57   | 0.007          | 0.00                             | 0.01 | 0.00    | 0.000          |
| 1   | rs4498805        | 92,842,367  | RP2           | C  | A  | 437,231 | 0.986    | 0.06  | 0.009 | 6.7E-12                            | 47.85   | 0.011          | 0.06                             | 0.01 | 24.16   | 0.006          |
| 1   | rs4498805        | 110,910,397 | SLC16A4       | T  | G  | 464,158 | 0.453    | 0.015 | 0.002 | 5.7E-14                            | 54.02   | 0.012          | 0.01                             | 0.00 | 38.31   | 0.008          |
| 1   | rs3838300        | 114,442,335 | MA3G3         | C  | CA | 463,050 | 0.820    | 0.033 | 0.003 | 6.1E-36                            | 138.29  | 0.030          | 0.03                             | 0.00 | 138.29  | 0.030          |
| 1   | rs11579626       | 146,741,960 | CHD1L         | C  | A  | 464,433 | 0.915    | 0.027 | 0.004 | 1.3E-13                            | 49.79   | 0.011          | 0.03                             | 0.00 | 28.90   | 0.006          |
| 1   | rs61818036       | 151,364,199 | PSMB4         | G  | A  | 461,745 | 0.176    | 0.019 | 0.003 | 2.1E-12                            | 55.47   | 0.012          | 0.02                             | 0.00 | 41.71   | 0.009          |
| 1   | rs932002         | 226,577,306 | PAP1          | C  | T  | 463,856 | 0.849    | 0.04  | 0.003 | 7.3E-47                            | 203.18  | 0.044          | 0.04                             | 0.00 | 203.18  | 0.044          |
| 2   | rs9752694        | 17,874,177  | SMC6          | C  | T  | 461,608 | 0.571    | 0.014 | 0.002 | 2.7E-12                            | 47.06   | 0.010          | 0.01                             | 0.00 | 21.96   | 0.005          |
| 2   | rs56178008       | 29,098,543  | TRMT61B       | A  | T  | 463,319 | 0.563    | 0.014 | 0.002 | 9.7E-13                            | 47.06   | 0.010          | 0.01                             | 0.00 | 21.96   | 0.005          |
| 2   | rs202034370      | 54,488,018  | UNC80         | T  | TA | 456,276 | 0.975    | 0.103 | 0.007 | 2.6E-56                            | 241.15  | 0.053          | 0.10                             | 0.01 | 241.15  | 0.053          |
| 2   | rs12613375       | 58,984,109  | LINC01122     | T  | C  | 461,376 | 0.862    | 0.018 | 0.003 | 9.1E-10                            | 41.14   | 0.009          | 0.01                             | 0.01 | 7.83    | 0.002          |
| 2   | rs775145631      | 210,667,432 | ATTC          | T  | TC | 462,415 | 0.704    | 0.012 | 0.002 | 1.4E-08                            | 27.32   | 0.006          | 0.00                             | 0.00 | 0.01    | 0.000          |
| 2   | rs35671754       | 216,220,870 | THRB          | T  | G  | 462,765 | 0.328    | 0.015 | 0.002 | 4.4E-12                            | 54.02   | 0.012          | 0.01                             | 0.00 | 38.31   | 0.008          |
| 3   | rs869785         | 24,347,800  | SMARCC1       | G  | A  | 416,872 | 0.985    | 0.061 | 0.008 | 1.1E-12                            | 52.50   | 0.013          | 0.06                             | 0.01 | 35.54   | 0.009          |
| 3   | rs575032615      | 47,638,657  | SHO1          | A  | C  | 464,716 | 0.982    | 0.076 | 0.007 | 1.9E-24                            | 105.53  | 0.023          | 0.08                             | 0.01 | 105.52  | 0.023          |
| 3   | rs78491606       | 72,891,547  | GATA2         | G  | A  | 463,785 | 0.402    | 0.017 | 0.002 | 1.1E-17                            | 69.39   | 0.015          | 0.02                             | 0.00 | 65.51   | 0.014          |
| 3   | rs6776756        | 128,215,821 | PIK3CB        | T  | TA | 454,254 | 0.441    | 0.015 | 0.002 | 9.1E-13                            | 54.02   | 0.012          | 0.01                             | 0.00 | 38.31   | 0.008          |
| 3   | 3-138398778_TA_T | 160,119,525 | TERC          | T  | A  | 464,361 | 0.458    | 0.017 | 0.002 | 5.9E-18                            | 69.39   | 0.015          | 0.02                             | 0.00 | 65.51   | 0.014          |
| 3   | rs2293607        | 169,482,335 | POLN,AAAA     | C  | C  | 464,283 | 0.758    | 0.094 | 0.002 | <1.0E-314                          | 1676.20 | 0.360          | 0.09                             | 0.00 | 1676.20 | 0.360          |
| 4   | rs759336006      | 2,191,1750  | CCDC96        | C  | T  | 461,329 | 0.886    | 0.025 | 0.003 | 1.1E-14                            | 66.69   | 0.014          | 0.02                             | 0.00 | 62.09   | 0.013          |
| 4   | rs871134         | 7,044,380   | SLOC2A9       | G  | T  | 464,716 | 0.431    | 0.018 | 0.002 | 1.7E-19                            | 77.79   | 0.017          | 0.02                             | 0.00 | 76.32   | 0.017          |
| 4   | rs13129697       | 9,926,967   | EXOSC9,ACTT   | C  | T  | 464,716 | 0.721    | 0.017 | 0.002 | 1.5E-14                            | 54.82   | 0.012          | 0.02                             | 0.00 | 40.20   | 0.009          |
| 4   | rs35500378       | 122,729,413 | NAF1          | A  | C  | 459,000 | 0.611    | 0.014 | 0.002 | 2.0E-12                            | 47.06   | 0.010          | 0.01                             | 0.00 | 21.96   | 0.005          |
| 4   | rs4435700        | 164,020,174 | NAF1          | A  | C  | 459,000 | 0.235    | 0.054 | 0.004 | 2.2E-112                           | 553.17  | 0.120          | 0.05                             | 0.00 | 553.17  | 0.120          |
| 5   | rs112951499      | 50,697      | LOC105374602  | A  | C  | 415,296 | 0.937    | 0.034 | 0.004 | 8.1E-15                            | 61.46   | 0.015          | 0.03                             | 0.00 | 53.79   | 0.013          |
| 5   | rs7705526        | 1,285,974   | UBED2         | A  | C  | 451,006 | 0.673    | 0.078 | 0.002 | 2.4E-282                           | 1154.14 | 0.255          | 0.08                             | 0.00 | 1154.14 | 0.255          |
| 5   | rs61748181       | 1,294,166   | TENT2,(PAPD4) | C  | T  | 463,851 | 0.971    | 0.059 | 0.006 | 2.8E-23                            | 101.11  | 0.022          | 0.06                             | 0.01 | 101.09  | 0.022          |
| 5   | 5-78951569_GT_G  | 78,951,569  | UBED2         | GT | G  | 463,081 | 0.899    | 0.025 | 0.003 | 1.9E-13                            | 56.83   | 0.012          | 0.02                             | 0.00 | 44.77   | 0.010          |
| 5   | rs34255404       | 138,935,580 | LOC285766     | A  | G  | 463,012 | 0.943    | 0.037 | 0.004 | 6.8E-18                            | 72.79   | 0.016          | 0.04                             | 0.00 | 70.69   | 0.015          |
| 6   | rs80324517       | 204,031     | LOC102723672  | A  | G  | 464,716 | 0.952    | 0.04  | 0.005 | 1.8E-17                            | 75.88   | 0.016          | 0.04                             | 0.00 | 74.50   | 0.016          |
| 7   | rs117247304      | 69,010      | STK31         | G  | A  | 372,378 | 0.976    | 0.064 | 0.007 | 4.2E-18                            | 74.84   | 0.020          | 0.06                             | 0.01 | 73.33   | 0.020          |
| 7   | rs13230646       | 23,930,316  | IKZF1         | T  | C  | 458,458 | 0.751    | 0.017 | 0.002 | 8.9E-14                            | 54.82   | 0.012          | 0.02                             | 0.00 | 40.20   | 0.009          |
| 7   | rs11769630       | 50,257,703  | UPKB          | T  | A  | 455,587 | 0.928    | 0.026 | 0.004 | 4.3E-11                            | 46.17   | 0.010          | 0.02                             | 0.01 | 19.86   | 0.004          |
| 7   | rs2538745        | 76,310,784  | UPKB          | T  | C  | 459,153 | 0.397    | 0.013 | 0.002 | 3.1E-10                            | 40.58   | 0.009          | 0.01                             | 0.00 | 6.63    | 0.001          |

| Chr | Genetic Variant   | BP GRCh37   | GENE      | A1 | A2 | N_jmp FREQ (A1) | Uncorrected for the winner's course |       |        |          |                | Corrected for the winner's course |       |      |                |       |
|-----|-------------------|-------------|-----------|----|----|-----------------|-------------------------------------|-------|--------|----------|----------------|-----------------------------------|-------|------|----------------|-------|
|     |                   |             |           |    |    |                 | Beta                                | SE    | Pvalue | F        | %var explained | Beta                              | SE    | F    | %var explained |       |
| 7   | rs2056726         | 99,780,283  | STAG3     | G  | A  | 464,552         | 0.786                               | 0.023 | 0.003  | 7.9E-21  | 81.29          | 0.017                             | 0.02  | 0.00 | 80.48          | 0.017 |
| 7   | rs609953          | 123,422,444 | RNU6-2    | A  | T  | 459,026         | 0.618                               | 0.013 | 0.002  | 7.0E-11  | 32.06          | 0.007                             | 0.00  | 0.01 | 0.01           | 0.000 |
| 7   | rs7790856         | 124,459,852 | POT1      | C  | T  | 464,345         | 0.711                               | 0.044 | 0.002  | 1.8E-87  | 367.26         | 0.079                             | 0.04  | 0.00 | 367.26         | 0.079 |
| 7   | rs4731541         | 128,678,236 | TNPO3     | C  | G  | 464,268         | 0.375                               | 0.021 | 0.002  | 1.4E-23  | 105.88         | 0.023                             | 0.02  | 0.00 | 105.86         | 0.023 |
| 7   | rs1985369         | 159,119,220 | XPO7      | A  | G  | 445,833         | 0.132                               | 0.031 | 0.003  | 3.6E-25  | 102.55         | 0.023                             | 0.03  | 0.00 | 102.52         | 0.023 |
| 8   | rs2306646         | 21,884,586  | MCM4      | G  | C  | 461,926         | 0.443                               | 0.021 | 0.002  | 3.3E-25  | 105.88         | 0.023                             | 0.02  | 0.00 | 105.86         | 0.023 |
| 8   | rs762679          | 48,885,436  | MCM4      | A  | T  | 464,716         | 0.141                               | 0.031 | 0.003  | 1.4E-27  | 102.55         | 0.022                             | 0.03  | 0.00 | 102.52         | 0.022 |
| 8   | rs564224004       | 56,667,553  | TGSI      | C  | T  | 457,659         | 0.115                               | 0.031 | 0.003  | 2.1E-22  | 102.55         | 0.022                             | 0.03  | 0.00 | 102.52         | 0.022 |
| 8   | rs7012816         | 70,964,743  | PRDM14    | A  | G  | 464,716         | 0.870                               | 0.018 | 0.003  | 3.0E-09  | 41.14          | 0.009                             | 0.01  | 0.01 | 7.83           | 0.002 |
| 8   | rs10112752        | 73,958,718  | TERF1     | G  | A  | 462,003         | 0.570                               | 0.029 | 0.002  | 9.5E-46  | 201.92         | 0.044                             | 0.03  | 0.00 | 201.92         | 0.044 |
| 8   | rs404091189       | 74,150,379  | VIRMA     | T  | G  | 385,475         | 0.998                               | 0.191 | 0.024  | 3.8E-16  | 64.81          | 0.017                             | 0.19  | 0.00 | 59.64          | 0.015 |
| 8   | rs1023767         | 95,530,969  | DMRT1     | G  | A  | 464,716         | 0.762                               | 0.018 | 0.002  | 5.0E-15  | 61.46          | 0.013                             | 0.02  | 0.00 | 53.20          | 0.011 |
| 9   | rs4742448         | 826,585     | ZNF462    | G  | C  | 443,556         | 0.531                               | 0.015 | 0.002  | 6.4E-14  | 54.02          | 0.012                             | 0.01  | 0.00 | 38.31          | 0.009 |
| 9   | rs4743037         | 109,639,970 | ZNF462    | T  | C  | 462,541         | 0.769                               | 0.015 | 0.002  | 5.1E-10  | 42.68          | 0.009                             | 0.01  | 0.00 | 11.31          | 0.002 |
| 10  | rs76222726        | 5,816,070   | ASB13     | A  | C  | 462,547         | 0.399                               | 0.018 | 0.002  | 1.9E-19  | 77.79          | 0.017                             | 0.017 | 0.00 | 11.31          | 0.016 |
| 10  | rs12572897        | 96,114,835  | NOC3L     | G  | A  | 464,716         | 0.870                               | 0.032 | 0.003  | 3.6E-27  | 109.27         | 0.024                             | 0.03  | 0.00 | 109.26         | 0.024 |
| 10  | 10:101274251_CT_C | 101,274,251 | NKX2-3    | CT | C  | 463,870         | 0.620                               | 0.022 | 0.002  | 1.9E-27  | 116.20         | 0.025                             | 0.02  | 0.00 | 116.20         | 0.025 |
| 10  | rs4919611         | 103,894,939 | PPRC1     | C  | A  | 464,716         | 0.113                               | 0.026 | 0.003  | 5.1E-16  | 61.46          | 0.013                             | 0.03  | 0.00 | 53.63          | 0.012 |
| 10  | rs9419958         | 105,675,946 | ODF3      | T  | C  | 463,885         | 0.139                               | 0.081 | 0.003  | 2.6E-167 | 700.11         | 0.151                             | 0.08  | 0.00 | 700.11         | 0.151 |
| 11  | rs939916          | 202,253     | WEE1      | A  | C  | 458,773         | 0.330                               | 0.024 | 0.002  | 6.6E-29  | 138.29         | 0.030                             | 0.02  | 0.00 | 138.29         | 0.030 |
| 11  | rs10840270        | 9,629,553   | WEE1      | G  | C  | 460,657         | 0.344                               | 0.014 | 0.002  | 1.3E-11  | 37.18          | 0.008                             | 0.01  | 0.01 | 1.11           | 0.000 |
| 11  | rs611646          | 108,177,097 | FLI1      | T  | A  | 464,305         | 0.591                               | 0.037 | 0.002  | 3.5E-73  | 328.68         | 0.071                             | 0.04  | 0.00 | 328.68         | 0.071 |
| 11  | rs6590343         | 128,500,215 | FLI1      | G  | A  | 463,852         | 0.484                               | 0.012 | 0.002  | 1.5E-09  | 34.57          | 0.007                             | 0.00  | 0.01 | 0.01           | 0.005 |
| 12  | rs10845387        | 11,757,743  | LINC01252 | G  | A  | 464,716         | 0.647                               | 0.014 | 0.002  | 1.5E-11  | 47.06          | 0.010                             | 0.01  | 0.00 | 21.96          | 0.005 |
| 12  | rs12369950        | 24,762,109  | LINC00477 | T  | C  | 462,282         | 0.859                               | 0.018 | 0.003  | 8.0E-10  | 34.57          | 0.007                             | 0.00  | 0.00 | 0.00           | 0.000 |
| 12  | rs79977579        | 54,694,560  | SMUG1     | A  | C  | 457,062         | 0.904                               | 0.028 | 0.004  | 2.3E-16  | 61.46          | 0.013                             | 0.03  | 0.00 | 53.68          | 0.012 |
| 12  | rs1907702         | 88,955,469  | KITLG     | A  | G  | 462,976         | 0.233                               | 0.015 | 0.003  | 5.9E-10  | 34.57          | 0.007                             | 0.00  | 0.01 | 0.00           | 0.000 |
| 12  | rs7666444         | 120,904,895 | SRSF9     | A  | T  | 461,128         | 0.899                               | 0.03  | 0.003  | 8.2E-19  | 81.83          | 0.018                             | 0.03  | 0.00 | 81.18          | 0.018 |
| 12  | rs4758644         | 122,943,915 | ZCCHC8    | A  | C  | 464,129         | 0.269                               | 0.017 | 0.002  | 2.7E-13  | 54.82          | 0.012                             | 0.02  | 0.00 | 40.20          | 0.009 |
| 12  | rs79228077        | 133,046,343 | MUC8      | G  | T  | 394,231         | 0.369                               | 0.015 | 0.002  | 2.3E-11  | 54.02          | 0.014                             | 0.01  | 0.00 | 38.31          | 0.010 |
| 13  | rs13332941        | 41,695,100  | KBTBD6    | G  | A  | 460,016         | 0.180                               | 0.026 | 0.003  | 5.9E-21  | 85.85          | 0.019                             | 0.03  | 0.00 | 85.45          | 0.019 |
| 13  | rs3093888         | 73,540,177  | DSS3      | A  | G  | 447,674         | 0.984                               | 0.067 | 0.008  | 1.6E-16  | 67.36          | 0.015                             | 0.07  | 0.01 | 63.46          | 0.014 |
| 13  | rs35017269        | 20,812,951  | TEP1      | G  | A  | 463,795         | 0.949                               | 0.029 | 0.005  | 1.5E-10  | 39.88          | 0.009                             | 0.02  | 0.01 | 5.21           | 0.001 |
| 14  | rs12884911        | 65,027,871  | PPP1R36   | C  | T  | 463,054         | 0.497                               | 0.013 | 0.002  | 2.9E-11  | 40.58          | 0.009                             | 0.01  | 0.00 | 6.63           | 0.001 |
| 14  | rs73581419        | 21,941,148  | RAB2B     | T  | C  | 462,410         | 0.893                               | 0.023 | 0.003  | 1.3E-12  | 56.45          | 0.012                             | 0.02  | 0.00 | 43.93          | 0.009 |
| 14  | rs3093888         | 65,027,871  | PPP1R36   | C  | T  | 463,054         | 0.497                               | 0.013 | 0.002  | 2.9E-11  | 40.58          | 0.009                             | 0.01  | 0.00 | 6.63           | 0.001 |
| 14  | rs762810          | 73,418,095  | MAX       | A  | G  | 463,076         | 0.648                               | 0.02  | 0.002  | 4.3E-22  | 96.04          | 0.021                             | 0.02  | 0.00 | 95.93          | 0.021 |
| 14  | rs137901416       | 91,970,514  | DCAF4     | A  | G  | 463,864         | 0.900                               | 0.046 | 0.003  | 4.7E-43  | 192.39         | 0.041                             | 0.05  | 0.00 | 192.39         | 0.041 |
| 14  | 14:91970514_GA_G  | 91,970,514  | PPP4R3A   | G  | GA | 463,412         | 0.544                               | 0.019 | 0.002  | 6.3E-22  | 86.67          | 0.019                             | 0.02  | 0.00 | 86.22          | 0.019 |
| 14  | rs1957937         | 96,181,360  | TCL1A     | T  | A  | 463,272         | 0.840                               | 0.021 | 0.003  | 1.9E-14  | 67.76          | 0.015                             | 0.02  | 0.00 | 63.49          | 0.014 |
| 15  | rs17677991        | 42,032,383  | MGA       | C  | C  | 464,716         | 0.658                               | 0.022 | 0.002  | 7.4E-26  | 116.20         | 0.025                             | 0.02  | 0.00 | 116.20         | 0.025 |
| 15  | rs181647350       | 50,379,219  | ATP8B4    | T  | C  | 455,018         | 0.761                               | 0.034 | 0.002  | 4.4E-26  | 219.30         | 0.048                             | 0.03  | 0.00 | 219.30         | 0.048 |
| 15  | rs1980240         | 56,774,018  | TEX9      | C  | A  | 462,804         | 0.595                               | 0.013 | 0.002  | 2.2E-10  | 40.58          | 0.009                             | 0.01  | 0.00 | 6.63           | 0.001 |
| 16  | rs80116508        | 3,650,970   | SLX4      | G  | A  | 458,739         | 0.938                               | 0.035 | 0.004  | 2.0E-17  | 73.53          | 0.016                             | 0.03  | 0.00 | 71.60          | 0.016 |
| 16  | rs450962          | 14,652,220  | USP7      | T  | T  | 461,847         | 0.589                               | 0.015 | 0.002  | 5.3E-14  | 54.02          | 0.012                             | 0.01  | 0.00 | 38.31          | 0.008 |
| 16  | rs11646283        | 9,073,060   | PARN      | G  | A  | 408,252         | 0.975                               | 0.057 | 0.007  | 4.9E-17  | 73.85          | 0.018                             | 0.06  | 0.01 | 72.11          | 0.018 |
| 16  | rs182059586       | 28,413,517  | EIF3CL    | G  | C  | 384,323         | 0.716                               | 0.014 | 0.003  | 5.9E-09  | 30.12          | 0.008                             | 0.00  | 0.01 | 0.00           | 0.000 |
| 16  | rs8053839         | 48,390,512  | LONP2     | G  | T  | 457,145         | 0.458                               | 0.014 | 0.002  | 1.0E-11  | 47.06          | 0.010                             | 0.01  | 0.00 | 21.96          | 0.005 |
| 16  | rs12447324        | 50,089,038  | PAPD5     | A  | C  | 449,188         | 0.803                               | 0.017 | 0.003  | 4.4E-11  | 44.41          | 0.017                             | 0.02  | 0.00 | 15.45          | 0.003 |
| 16  | rs76219171        | 50,188,929  | PAPD5     | A  | G  | 450,771         | 0.942                               | 0.036 | 0.004  | 7.8E-17  | 77.79          | 0.017                             | 0.04  | 0.00 | 76.71          | 0.017 |
| 16  | rs139438549       | 67,692,863  | TERF2     | C  | T  | 452,323         | 0.999                               | 0.256 | 0.030  | 2.7E-17  | 71.11          | 0.016                             | 0.26  | 0.03 | 68.70          | 0.015 |
| 16  | rs142507451       | 67,694,044  | TERF2     | C  | T  | 461,205         | 0.997                               | 0.142 | 0.019  | 1.6E-14  | 58.14          | 0.013                             | 0.14  | 0.02 | 47.79          | 0.010 |
| 16  | rs28301822        | 69,403,012  | TERF2     | T  | A  | 464,229         | 0.711                               | 0.024 | 0.002  | 1.7E-27  | 138.29         | 0.030                             | 0.02  | 0.00 | 138.29         | 0.030 |
| 16  | rs62053340        | 69,987,764  | EXOSC6    | C  | T  | 457,598         | 0.617                               | 0.021 | 0.002  | 1.2E-24  | 105.88         | 0.023                             | 0.02  | 0.00 | 105.86         | 0.023 |

| Chr | Genetic Variant    | BP GRCh37  | GENE     | A1 | A2 | N_jmp   | FREQ(A1) | Uncorrected for the winner's course |       |          |        | Corrected for the winner's course |      |      |        |                |
|-----|--------------------|------------|----------|----|----|---------|----------|-------------------------------------|-------|----------|--------|-----------------------------------|------|------|--------|----------------|
|     |                    |            |          |    |    |         |          | Beta                                | SE    | Pvalue   | F      | %var explained                    | Beta | SE   | F      | %var explained |
| 16  | rs34003787         | 73,071,381 | ZHX3     | C  | T  | 449,493 | 0.912    | 0.024                               | 0.004 | 1.9E-11  | 45.16  | 0.010                             | 0.02 | 0.01 | 17.33  | 0.004          |
| 16  | rs11866592         | 74,654,396 |          | A  | G  | 464,397 | 0.858    | 0.035                               | 0.003 | 1.3E-33  | 155.56 | 0.033                             | 0.03 | 0.00 | 155.56 | 0.033          |
| 16  | rs2303262          | 82,203,758 | MPHOSPH6 | C  | T  | 464,716 | 0.223    | 0.047                               | 0.003 | 2.9E-85  | 339.43 | 0.073                             | 0.05 | 0.00 | 339.43 | 0.073          |
| 16  | rs62046862         | 88,073,029 | BANP     | A  | C  | 441,263 | 0.479    | 0.024                               | 0.002 | 4.9E-31  | 138.29 | 0.031                             | 0.02 | 0.00 | 138.29 | 0.031          |
| 16  | rs9923119          | 90,153,815 | PRDM7    | C  | T  | 446,260 | 0.750    | 0.018                               | 0.002 | 1.8E-13  | 61.46  | 0.014                             | 0.02 | 0.00 | 53.20  | 0.012          |
| 17  | rs7218033          | 1,694,247  | RPA1     | C  | T  | 460,449 | 0.747    | 0.023                               | 0.002 | 1.0E-22  | 100.35 | 0.022                             | 0.02 | 0.00 | 100.31 | 0.022          |
| 17  | rs4724             | 7,760,397  | CTCI     | G  | A  | 464,716 | 0.883    | 0.055                               | 0.003 | 9.8E-69  | 322.79 | 0.069                             | 0.06 | 0.00 | 322.79 | 0.069          |
| 17  | rs75664430         | 8,064,779  |          | C  | C  | 462,922 | 0.752    | 0.024                               | 0.002 | 3.6E-24  | 109.27 | 0.024                             | 0.02 | 0.00 | 109.26 | 0.024          |
| 17  | rs111527438        | 29,252,703 | ADAP2    | C  | T  | 462,353 | 0.649    | 0.013                               | 0.002 | 3.1E-09  | 32.06  | 0.007                             | 0.00 | 0.01 | 0.01   | 0.000          |
| 17  | rs12941945         | 41,448,228 |          | A  | G  | 458,692 | 0.832    | 0.026                               | 0.003 | 3.0E-22  | 103.87 | 0.023                             | 0.03 | 0.00 | 103.85 | 0.023          |
| 17  | rs34405642         | 65,741,012 | NOL1     | GA | G  | 413,522 | 0.415    | 0.013                               | 0.002 | 2.6E-09  | 40.58  | 0.010                             | 0.01 | 0.00 | 6.63   | 0.002          |
| 17  | rs2069536          | 74,001,106 | TEN1     | A  | G  | 463,298 | 0.250    | 0.015                               | 0.002 | 1.8E-10  | 42.68  | 0.009                             | 0.01 | 0.00 | 11.31  | 0.002          |
| 17  | rs144204502        | 76,183,233 |          | C  | T  | 447,012 | 0.987    | 0.101                               | 0.009 | 3.4E-28  | 127.96 | 0.029                             | 0.10 | 0.01 | 127.96 | 0.029          |
| 18  | rs3891167          | 658,423    |          | A  | G  | 427,300 | 0.747    | 0.043                               | 0.002 | 1.2E-70  | 350.76 | 0.082                             | 0.04 | 0.00 | 350.76 | 0.082          |
| 18  | rs78694226         | 710,980    |          | G  | A  | 452,168 | 0.992    | 0.066                               | 0.011 | 6.8E-09  | 33.05  | 0.007                             | 0.00 | 0.07 | 0.00   | 0.000          |
| 18  | rs8088834          | 42,151,261 |          | T  | C  | 462,570 | 0.237    | 0.026                               | 0.002 | 8.1E-28  | 128.24 | 0.028                             | 0.03 | 0.00 | 128.24 | 0.028          |
| 18  | rs2276182          | 51,798,047 |          | C  | C  | 464,368 | 0.597    | 0.023                               | 0.002 | 2.8E-30  | 127.01 | 0.027                             | 0.02 | 0.00 | 127.01 | 0.027          |
| 18  | rs6565924          | 74,691,225 | POL1     | G  | A  | 461,318 | 0.639    | 0.013                               | 0.002 | 2.9E-10  | 40.58  | 0.009                             | 0.01 | 0.00 | 6.63   | 0.001          |
| 18  | rs1879100          | 77,985,740 | PARP26G  | C  | T  | 452,390 | 0.138    | 0.019                               | 0.003 | 8.1E-11  | 38.52  | 0.009                             | 0.01 | 0.01 | 2.85   | 0.001          |
| 19  | rs80337039         | 4,105,089  | MAP2K2   | T  | G  | 388,380 | 0.994    | 0.081                               | 0.014 | 2.3E-09  | 35.89  | 0.009                             | 0.02 | 0.06 | 0.16   | 0.000          |
| 19  | rs35601737         | 13,220,703 | TRMT1    | C  | G  | 464,716 | 0.704    | 0.014                               | 0.002 | 1.9E-10  | 47.06  | 0.010                             | 0.01 | 0.00 | 21.96  | 0.005          |
| 19  | rs8105767          | 22,215,441 | ZNF208   | G  | A  | 461,895 | 0.705    | 0.033                               | 0.002 | 2.5E-50  | 261.46 | 0.057                             | 0.03 | 0.00 | 261.46 | 0.057          |
| 19  | rs4530278          | 33,752,994 | CEBPA    | T  | G  | 457,460 | 0.402    | 0.014                               | 0.002 | 1.5E-11  | 47.06  | 0.010                             | 0.01 | 0.00 | 21.96  | 0.005          |
| 19  | rs11084431         | 56,708,667 | ZSCAN5B  | G  | A  | 451,567 | 0.396    | 0.012                               | 0.002 | 4.0E-09  | 34.57  | 0.008                             | 0.00 | 0.01 | 0.01   | 0.000          |
| 19  | rs8102497          | 57,370,055 | PEG3     | G  | A  | 461,793 | 0.568    | 0.015                               | 0.002 | 1.4E-13  | 54.02  | 0.012                             | 0.01 | 0.00 | 38.31  | 0.008          |
| 20  | rs1291143          | 35,525,640 | SAMHD1   | C  | A  | 463,481 | 0.151    | 0.049                               | 0.003 | 1.8E-69  | 304.90 | 0.066                             | 0.05 | 0.00 | 304.90 | 0.066          |
| 20  | rs544699357        | 41,997,057 | SRSF6    | T  | C  | 373,245 | 0.998    | 0.169                               | 0.025 | 1.1E-11  | 45.70  | 0.012                             | 0.16 | 0.04 | 18.67  | 0.005          |
| 20  | rs577449057        | 62,236,709 | RTEL1    | A  | G  | 268,900 | 0.995    | 0.154                               | 0.018 | 1.4E-17  | 72.29  | 0.027                             | 0.15 | 0.02 | 70.22  | 0.026          |
| 20  | rs187013287        | 62,298,374 |          | A  | T  | 370,530 | 0.997    | 0.283                               | 0.022 | 7.9E-38  | 166.39 | 0.045                             | 0.28 | 0.02 | 166.39 | 0.045          |
| 20  | rs35640778         | 62,321,128 |          | G  | A  | 464,716 | 0.979    | 0.209                               | 0.007 | 9.6E-195 | 856.12 | 0.184                             | 0.21 | 0.01 | 856.12 | 0.184          |
| 20  | 20:62321690_GAGA_1 | 62,321,690 |          | G  | A  | 349,451 | 0.996    | 0.118                               | 0.017 | 1.3E-11  | 46.27  | 0.013                             | 0.11 | 0.01 | 220.13 | 0.006          |
| 20  | rs115610405        | 62,325,833 |          | C  | A  | 464,716 | 0.981    | 0.11                                | 0.007 | 1.8E-50  | 221.08 | 0.048                             | 0.11 | 0.01 | 221.08 | 0.048          |
| 20  | rs187577818        | 62,358,869 |          | C  | A  | 373,318 | 0.997    | 0.298                               | 0.021 | 6.6E-44  | 193.39 | 0.052                             | 0.30 | 0.02 | 193.39 | 0.052          |
| 20  | rs111527478        | 62,678,100 |          | A  | G  | 457,574 | 0.900    | 0.022                               | 0.003 | 1.2E-10  | 44.01  | 0.010                             | 0.02 | 0.01 | 14.48  | 0.003          |
| 22  | rs28502153         | 17,469,049 | GAB4     | C  | A  | 464,716 | 0.622    | 0.022                               | 0.002 | 1.2E-25  | 116.20 | 0.025                             | 0.02 | 0.00 | 116.20 | 0.025          |
| 22  | rs5845706          | 45,779,013 | SMC1B    | CA | C  | 459,636 | 0.644    | 0.015                               | 0.002 | 2.2E-12  | 54.02  | 0.012                             | 0.01 | 0.00 | 38.31  | 0.008          |
| 22  | rs131796           | 50,971,639 | TYMP     | G  | GA | 460,083 | 0.236    | 0.024                               | 0.002 | 6.7E-25  | 109.27 | 0.024                             | 0.02 | 0.00 | 109.26 | 0.024          |

3.619

3.267
