# Supplementary material for: Mid-life leukocyte telomere length and dementia risk: a prospective cohort study of 435,046 UK Biobank participants
Source: bioRxiv or medRxiv preprint supplement (doi:10.1101/2022.06.30.22277121), 2022-07-20
Supplement: Supplementary file [file media-2.pdf]

## Supplementary Online Content

### Mid-life leukocyte telomere length and dementia risk: a prospective cohort study of 435,046 UK Biobank participants

#### *Supplement 2*

**eTable 1** | UKB field IDs and ICD-10 codes for identification of AD/ADRD

**eTable 2** | A selection of UK Biobank cognitive tests

**eTable 3** | Selected imaging derived phenotypes

**eTable 4** | Baseline characteristics of participants in the baseline or imaging cohort

**eTable 5** | Participant characteristics at baseline of incident AD/ADRD cases versus normal controls

**eFigure 1** | Relationship between baseline leukocyte telomere length and incidence of AD/ADRD

**eFigure 2** | Associations between genetically determined telomere length and AD/ADRD using the Inverse Variance Weighted (IVW) method

**eFigure 3** | Associations between genetically determined telomere length and cognitive function using the Inverse Variance Weighted (IVW) method

**eFigure 4** | Associations between genetically determined telomere length and volumetric IDPs of AD signatures and white matter hyperintensities (WMH) using the Inverse Variance Weighted (IVW) method

**eFigure 5** | Associations between genetically determined telomere length and weighted-mean fractional anisotropy IDPs using the Inverse Variance Weighted (IVW) method

**eFigure 6** | Associations between genetically determined telomere length and weighted-mean mean diffusivity IDPs using the Inverse Variance Weighted (IVW) method

**eFigure 7** | Associations between genetically determined telomere length and AD/ADRD, comparing the primary (IVW: inverse variance weighted) to secondary MR methods (Mendelian randomization robust adjusted profile score (MR-RAPS); weighted median based method; MR-Egger method)

**eFigure 8** | Associations between genetically determined telomere length and cognitive function, comparing the primary (IVW: inverse variance weighted) to secondary MR methods (Mendelian randomization robust adjusted profile score (MR-RAPS); weighted median based method; MR-Egger method)

**eFigure 9** | Associations between genetically determined telomere length and volumetric IDPs of AD signatures and white matter hyperintensities (WMH), comparing the primary (IVW: inverse variance weighted) to secondary MR methods (Mendelian randomization robust adjusted profile score (MR-RAPS); weighted median based method; MR-Egger method)

**eFigure 10** | Associations between genetically determined telomere length and weighted-mean fractional anisotropy IDPs, comparing the primary (IVW: inverse variance weighted) to secondary MR methods (Mendelian randomization robust adjusted profile score (MR-RAPS); weighted median based method; MR-Egger method)

**eFigure 11** | Associations between genetically determined telomere length and weighted-mean mean diffusivity IDPs, comparing the primary (IVW: inverse variance weighted) to secondary MR methods (Mendelian randomization robust adjusted profile score (MR-RAPS); weighted median based method; MR-Egger method)

**eTable 1. UKB field IDs and ICD-10 codes for identification of AD/ADRD**

| <b>AD/ADRD</b>                                                                                                                      | <b>UKB field ID</b> | <b>ICD-10</b> | <b>Data release period currently available in England*</b>                                                                                                                                     |
|-------------------------------------------------------------------------------------------------------------------------------------|---------------------|---------------|------------------------------------------------------------------------------------------------------------------------------------------------------------------------------------------------|
| Alzheimer's disease (AD)                                                                                                            | 131036              | G30           | Death data: April 2006-February 2021                                                                                                                                                           |
| Dementia in AD                                                                                                                      | 130836              | F00           |                                                                                                                                                                                                |
| Vascular dementia                                                                                                                   | 130838              | F01           | Hospital inpatient data: 1997-March 2021 for half of the UKB cohort                                                                                                                            |
| Unspecified dementia                                                                                                                | 130842              | F03           |                                                                                                                                                                                                |
| Other degenerative diseases of nervous system, not elsewhere classified, including frontotemporal dementia and Lewy body's dementia | 131038              | G31           | Primary care data: 1938-2017<br>Self-reported data: initial assessment visit (2006-2010), first repeat assessment visit (2012-2013), imaging visit (2014+), first repeat imaging visit (2019+) |

\*Data release period varied but similar for different countries in the United Kingdom; participants from England account for over 95% of the cohort.

**eTable 2. A selection of UK Biobank cognitive tests**

| <b>Cognitive domain</b>               | <b>Cognitive test</b>     | <b>Field ID</b> | <b>Baseline visit</b> | <b>First imaging visit</b> | <b>Web link</b>                                                                                                                     |
|---------------------------------------|---------------------------|-----------------|-----------------------|----------------------------|-------------------------------------------------------------------------------------------------------------------------------------|
| <b>Processing speed</b>               | Reaction time             | 20023           | G ✓                   |                            | <a href="https://biobank.ndph.ox.ac.uk/s/howcase/field.cgi?id=20023">https://biobank.ndph.ox.ac.uk/s/howcase/field.cgi?id=20023</a> |
| <b>Working memory</b>                 | Numeric memory            | 4282            | G ✓                   |                            | <a href="https://biobank.ndph.ox.ac.uk/s/howcase/field.cgi?id=4282">https://biobank.ndph.ox.ac.uk/s/howcase/field.cgi?id=4282</a>   |
| <b>Verbal and numerical reasoning</b> | Fluid intelligence        | 20016           | G ✓                   |                            | <a href="https://biobank.ndph.ox.ac.uk/s/howcase/field.cgi?id=20016">https://biobank.ndph.ox.ac.uk/s/howcase/field.cgi?id=20016</a> |
| <b>Prospective memory</b>             | Prospective memory        | 20018           | G                     |                            | <a href="https://biobank.ctsu.ox.ac.uk/crystal/field.cgi?id=20018">https://biobank.ctsu.ox.ac.uk/crystal/field.cgi?id=20018</a>     |
| <b>Visual declarative memory</b>      | Pairs matching            | 399             | G                     |                            | <a href="https://biobank.ndph.ox.ac.uk/s/howcase/field.cgi?id=399">https://biobank.ndph.ox.ac.uk/s/howcase/field.cgi?id=399</a>     |
| <b>Processing speed</b>               | Symbol digit substitution | 23324           |                       | ✓                          | <a href="https://biobank.ndph.ox.ac.uk/s/howcase/field.cgi?id=23324">https://biobank.ndph.ox.ac.uk/s/howcase/field.cgi?id=23324</a> |
| <b>Executive function</b>             | Trail making part B       | 6350            |                       | ✓                          | <a href="https://biobank.ndph.ox.ac.uk/s/howcase/field.cgi?id=6350">https://biobank.ndph.ox.ac.uk/s/howcase/field.cgi?id=6350</a>   |
| <b>Non-verbal reasoning</b>           | Matrix pattern completion | 6373            |                       | ✓                          | <a href="https://biobank.ndph.ox.ac.uk/s/howcase/field.cgi?id=6373">https://biobank.ndph.ox.ac.uk/s/howcase/field.cgi?id=6373</a>   |

G: general cognitive ability element

**eTable 3. Selected imaging derived phenotypes**

| Imaging derived phenotype (IDP)                                                                               | UKB Field ID |
|---------------------------------------------------------------------------------------------------------------|--------------|
| Volume of hippocampus (from T1 brain image)                                                                   | 25019/25020  |
| Volume of precuneus generated by parcellation of the white surface using Desikan-Killiany parcellation        | 26812/26913  |
| Volume of cuneus generated by parcellation of the white surface using Desikan-Killiany parcellation           | 26792/26893  |
| Volume of entorhinal generated by parcellation of the white surface using Desikan-Killiany parcellation       | 26793/26894  |
| Volume of inferiorparietal generated by parcellation of the white surface using Desikan-Killiany parcellation | 26795/26896  |
| Volume of parahippocampal generated by parcellation of the white surface using Desikan-Killiany parcellation  | 26803/26904  |
| Total volume of white matter hyperintensities (from T1 and T2_FLAIR images)                                   | 25781        |
| Mean FA (fractional anisotropy) in anterior corona radiata on FA skeleton                                     | 25079/25078  |
| Mean FA (fractional anisotropy) in anterior limb of internal capsule on FA skeleton                           | 25073/25072  |
| Mean FA (fractional anisotropy) in body of corpus callosum on FA skeleton                                     | 25059        |
| Mean FA (fractional anisotropy) in cerebral peduncle on FA skeleton                                           | 25071/25070  |
| Mean FA (fractional anisotropy) in cingulum cingulate gyrus on FA skeleton                                    | 25091/25090  |
| Mean FA (fractional anisotropy) in cingulum hippocampus on FA skeleton                                        | 25093/25092  |
| Mean FA (fractional anisotropy) in corticospinal tract on FA skeleton                                         | 25063/25062  |
| Mean FA (fractional anisotropy) in external capsule on FA skeleton                                            | 25089/25088  |
| Mean FA (fractional anisotropy) in fornix cres+stria terminalis on FA skeleton                                | 25095/25094  |
| Mean FA (fractional anisotropy) in fornix on FA skeleton                                                      | 25061        |
| Mean FA (fractional anisotropy) in genu of corpus callosum on FA skeleton                                     | 25058        |
| Mean FA (fractional anisotropy) in inferior cerebellar peduncle on FA skeleton                                | 25067/25066  |
| Mean FA (fractional anisotropy) in medial lemniscus on FA skeleton                                            | 25065/25064  |
| Mean FA (fractional anisotropy) in middle cerebellar peduncle on FA skeleton                                  | 25056        |
| Mean FA (fractional anisotropy) in pontine crossing tract on FA skeleton                                      | 25057        |
| Mean FA (fractional anisotropy) in posterior corona radiata on FA skeleton                                    | 25083/25082  |
| Mean FA (fractional anisotropy) in posterior limb of internal capsule on FA skeleton                          | 25075/25074  |
| Mean FA (fractional anisotropy) in posterior thalamic radiation on FA skeleton                                | 25085/25084  |
| Mean FA (fractional anisotropy) in retrolenticular part of internal capsule on FA skeleton                    | 25077/25076  |
| Mean FA (fractional anisotropy) in sagittal stratum on FA skeleton                                            | 25087/25086  |
| Mean FA (fractional anisotropy) in splenium of corpus callosum on FA skeleton                                 | 25060        |
| Mean FA (fractional anisotropy) in superior cerebellar peduncle on FA skeleton                                | 25069/25068  |
| Mean FA (fractional anisotropy) in superior corona radiata on FA skeleton                                     | 25081/25080  |
| Mean FA (fractional anisotropy) in superior fronto-occipital fasciculus on FA skeleton                        | 25099/25098  |
| Mean FA (fractional anisotropy) in superior longitudinal fasciculus on FA skeleton                            | 25097/25096  |
| Mean FA (fractional anisotropy) in tapetum on FA skeleton                                                     | 25103/25102  |
| Mean FA (fractional anisotropy) in uncinate fasciculus on FA skeleton                                         | 25101/25100  |
| Mean MD (mean diffusivity) in anterior corona radiata on FA (fractional anisotropy) skeleton                  | 25127/25126  |
| Mean MD (mean diffusivity) in anterior limb of internal capsule on FA (fractional anisotropy) skeleton        | 25121/25120  |
| Mean MD (mean diffusivity) in body of corpus callosum on FA (fractional anisotropy) skeleton                  | 25107        |
| Mean MD (mean diffusivity) in cerebral peduncle on FA (fractional anisotropy) skeleton                        | 25119/25118  |
| Mean MD (mean diffusivity) in cingulum cingulate gyrus on FA (fractional anisotropy) skeleton                 | 25139/25138  |
| Mean MD (mean diffusivity) in cingulum hippocampus on FA (fractional anisotropy) skeleton                     | 25141/25140  |

|                                                                                                               |             |
|---------------------------------------------------------------------------------------------------------------|-------------|
| Mean MD (mean diffusivity) in corticospinal tract on FA (fractional anisotropy) skeleton                      | 25111/25110 |
| Mean MD (mean diffusivity) in external capsule on FA (fractional anisotropy) skeleton                         | 25137/25136 |
| Mean MD (mean diffusivity) in fornix cres+stria terminalis on FA (fractional anisotropy) skeleton             | 25143/25142 |
| Mean MD (mean diffusivity) in fornix on FA (fractional anisotropy) skeleton                                   | 25109       |
| Mean MD (mean diffusivity) in genu of corpus callosum on FA (fractional anisotropy) skeleton                  | 25106       |
| Mean MD (mean diffusivity) in inferior cerebellar peduncle on FA (fractional anisotropy) skeleton             | 25115/25114 |
| Mean MD (mean diffusivity) in medial lemniscus on FA (fractional anisotropy) skeleton                         | 25113/25112 |
| Mean MD (mean diffusivity) in middle cerebellar peduncle on FA (fractional anisotropy) skeleton               | 25104       |
| Mean MD (mean diffusivity) in pontine crossing tract on FA (fractional anisotropy) skeleton                   | 25105       |
| Mean MD (mean diffusivity) in posterior corona radiata on FA (fractional anisotropy) skeleton                 | 25131/25130 |
| Mean MD (mean diffusivity) in posterior limb of internal capsule on FA (fractional anisotropy) skeleton       | 25123/25122 |
| Mean MD (mean diffusivity) in posterior thalamic radiation on FA (fractional anisotropy) skeleton             | 25133/25132 |
| Mean MD (mean diffusivity) in retrolenticular part of internal capsule on FA (fractional anisotropy) skeleton | 25125/25124 |
| Mean MD (mean diffusivity) in sagittal stratum on FA (fractional anisotropy) skeleton                         | 25135/25134 |
| Mean MD (mean diffusivity) in splenium of corpus callosum on FA (fractional anisotropy) skeleton              | 25108       |
| Mean MD (mean diffusivity) in superior cerebellar peduncle on FA (fractional anisotropy) skeleton             | 25117/25116 |
| Mean MD (mean diffusivity) in superior corona radiata on FA (fractional anisotropy) skeleton                  | 25129/25128 |
| Mean MD (mean diffusivity) in superior fronto-occipital fasciculus on FA (fractional anisotropy) skeleton     | 25147/25146 |
| Mean MD (mean diffusivity) in superior longitudinal fasciculus on FA (fractional anisotropy) skeleton         | 25145/25144 |
| Mean MD (mean diffusivity) in tapetum on FA (fractional anisotropy) skeleton                                  | 25151/25150 |
| Mean MD (mean diffusivity) in uncinate fasciculus on FA (fractional anisotropy) skeleton                      | 25149/25148 |

---

**eTable 4 Baseline characteristics of participants in the baseline or imaging cohort**

| <b>Characteristics</b>                                                     | <b>Baseline Cohort<br/>(N=435,046)</b> | <b>Imaging Cohort<br/>(N=43,390)</b> |
|----------------------------------------------------------------------------|----------------------------------------|--------------------------------------|
| <b>Baseline age, years (mean ± SD)</b>                                     | 56.8 ± 8                               | 55.3 ± 7.5                           |
| <b>Sex, female (%)</b>                                                     | 236,117 (54%)                          | 22,373 (52%)                         |
| <b>Death (%)</b>                                                           | 30,504 (7%)                            | 425 (1%)                             |
| <b>Age at death (mean ± SD)</b>                                            | 71.1 ± 7.3                             | 71.6 ± 6.4                           |
| <b>Education (%)</b>                                                       |                                        |                                      |
| None                                                                       | 75,541 (18%)                           | 2,984 (7%)                           |
| CSEs or equivalent                                                         | 16,231 (4%)                            | 1,122 (3%)                           |
| O levels/GCSEs or equivalent                                               | 59,497 (13%)                           | 4,705 (11%)                          |
| A/AS levels/NVQ/HND/HNC                                                    | 79,609 (18%)                           | 7,778 (18%)                          |
| Other professional qualifications                                          | 64,394 (15%)                           | 6,946 (16%)                          |
| College or university degree                                               | 137,941 (32%)                          | 19,721 (46%)                         |
| <b>Townsend deprivation index</b>                                          | -1.5 ± 3                               | -1.9 ± 2.7                           |
| <b>BMI, kg/m<sup>2</sup> (mean ± SD)</b>                                   | 27.4 ± 4.8                             | 26.6 ± 4.3                           |
| <b>Smoking status (%)</b>                                                  |                                        |                                      |
| Never                                                                      | 234,004 (54%)                          | 26,022 (60%)                         |
| Previous                                                                   | 154,156 (36%)                          | 14,596 (34%)                         |
| Current                                                                    | 45,343 (10%)                           | 2,687 (6%)                           |
| <b>Alcohol intake frequency (%)</b>                                        |                                        |                                      |
| Never                                                                      | 29,060 (7%)                            | 1,847 (4%)                           |
| Special occasions only                                                     | 46,553 (11%)                           | 3,323 (8%)                           |
| 1-3 times a month                                                          | 48,359 (11%)                           | 4,619 (11%)                          |
| 1-2 times a week                                                           | 114,513 (26%)                          | 11,195 (26%)                         |
| 3-4 times a week                                                           | 104,311 (24%)                          | 12,345 (28%)                         |
| Daily or almost daily                                                      | 91,947 (21%)                           | 10,053 (23%)                         |
| <b>IPAQ activity group (%)</b>                                             |                                        |                                      |
| Low                                                                        | 57,696 (14%)                           | 5,742 (14%)                          |
| Moderate                                                                   | 177,073 (44%)                          | 18,504 (45%)                         |
| High                                                                       | 163,435 (41%)                          | 16,902 (41%)                         |
| <b>APOE genotype (%)</b>                                                   |                                        |                                      |
| e3e3                                                                       | 254,331 (58.46%)                       | 25,619 (59.04%)                      |
| e2e3                                                                       | 53,573 (12.31%)                        | 5,388 (12.42%)                       |
| e2e2                                                                       | 2,766 (0.64%)                          | 250 (0.58%)                          |
| e2e4                                                                       | 10,931 (2.51%)                         | 1,036 (2.39%)                        |
| e3e4                                                                       | 103,077 (23.69%)                       | 10,122 (23.33%)                      |
| e4e4                                                                       | 10,350 (2.38%)                         | 975 (2.25%)                          |
| e1e2                                                                       | 3 (<0.01%)                             | 0 (0.00%)                            |
| <b>Telomere length (T/S ratio), adjusting<br/>for technical parameters</b> | 0.83 ± 0.13                            | 0.84 ± 0.13                          |

Abbreviations: SD, standard deviation; APOE, apolipoprotein E; CSE, certificate of secondary education; GCSE, general certificate of secondary education; NVQ, national vocational qualification; HND, higher national diploma; HNC, higher national certificate. BMI, body mass index; IPAQ, International Physical Activity Questionnaire.

**eTable 5. Participant characteristics at baseline of incident AD/ADRD cases versus normal controls**

| Characteristics                                                        | AD/ADRD<br>(N=6,424) | Normal Controls<br>(N=428,622) | P-Value                 |
|------------------------------------------------------------------------|----------------------|--------------------------------|-------------------------|
| <b>Baseline age, years (mean ± SD)</b>                                 | 64.0 ± 5.1           | 56.7 ± 8.0                     | < 2.2×10 <sup>-16</sup> |
| <b>Sex, female (%)</b>                                                 | 2,973 (46%)          | 233,144 (54%)                  | < 2.2×10 <sup>-16</sup> |
| <b>Death (%)</b>                                                       | 3,009 (47%)          | 27,495 (6%)                    | < 2.2×10 <sup>-16</sup> |
| <b>Age at death (mean ± SD)</b>                                        | 74.7 ± 5.3           | 69.4 ± 7.3                     |                         |
| <b>Education (%)</b>                                                   |                      |                                | < 2.2×10 <sup>-16</sup> |
| None                                                                   | 2,276 (36%)          | 73,265 (17%)                   |                         |
| CSEs or equivalent                                                     | 119 (2%)             | 16,112 (4%)                    |                         |
| O levels/GCSEs or equivalent                                           | 817 (13%)            | 56,680 (13%)                   |                         |
| A/AS levels/NVQ/HND/HNC                                                | 998 (16%)            | 78,611 (19%)                   |                         |
| Other professional qualifications                                      | 845 (13%)            | 63,549 (15%)                   |                         |
| College or university degree                                           | 1,246 (20%)          | 136,695 (32%)                  |                         |
| <b>Townsend deprivation index</b>                                      | -0.9 ± 3.3           | -1.5 ± 3.0                     | 7.3×10 <sup>-38</sup>   |
| <b>BMI, kg/m<sup>2</sup> (mean ± SD)</b>                               | 27.8 ± 5.0           | 27.4 ± 4.8                     | 9.3×10 <sup>-12</sup>   |
| <b>Smoking status (%)</b>                                              |                      |                                | < 2.2×10 <sup>-16</sup> |
| Never                                                                  | 2,842 (45%)          | 231,162 (54%)                  |                         |
| Previous                                                               | 2,777 (44%)          | 151,379 (35%)                  |                         |
| Current                                                                | 762 (12%)            | 44,581 (10%)                   |                         |
| <b>Alcohol intake frequency (%)</b>                                    |                      |                                | < 2.2×10 <sup>-16</sup> |
| Never                                                                  | 826 (13%)            | 28,234 (7%)                    |                         |
| Special occasions only                                                 | 875 (14%)            | 45,678 (11%)                   |                         |
| 1-3 times a month                                                      | 636 (10%)            | 47,723 (11%)                   |                         |
| 1-2 times a week                                                       | 1,471 (23%)          | 113,042 (26%)                  |                         |
| 3-4 times a week                                                       | 1,182 (18%)          | 103,129 (24%)                  |                         |
| Daily or almost daily                                                  | 1,420 (22%)          | 90,527 (21%)                   |                         |
| <b>IPAQ activity group (%)</b>                                         |                      |                                | 7.6×10 <sup>-7</sup>    |
| Low                                                                    | 925 (16%)            | 56,771 (14%)                   |                         |
| Moderate                                                               | 2,556 (45%)          | 174,517 (44%)                  |                         |
| High                                                                   | 2,144 (38%)          | 161,291 (41%)                  |                         |
| <b>APOE genotype (%)</b>                                               |                      |                                | < 2.2×10 <sup>-16</sup> |
| e3e3                                                                   | 2,651 (41.27%)       | 251,680 (59.72%)               |                         |
| e2e3                                                                   | 473 (7.36%)          | 53,100 (12.39%)                |                         |
| e2e2                                                                   | 30 (0.47%)           | 2,736 (0.64%)                  |                         |
| e2e4                                                                   | 159 (2.48%)          | 10,772 (2.51%)                 |                         |
| e3e4                                                                   | 2,449 (38.12%)       | 100,628 (23.48%)               |                         |
| e4e4                                                                   | 662 (10.31%)         | 9,688 (2.26%)                  |                         |
| e1e2                                                                   | 0 (0.00%)            | 3 (<0.01%)                     |                         |
| <b>Telomere length (T/S ratio), adjusting for technical parameters</b> | 0.80 ± 0.12          | 0.83 ± 0.13                    | < 2.2×10 <sup>-16</sup> |

Abbreviations: SD, standard deviation; APOE, apolipoprotein E; CSE, certificate of secondary education; GCSE, general certificate of secondary education; NVQ, national vocational qualification; HND, higher national diploma; HNC, higher national certificate. BMI, body mass index; IPAQ, International Physical Activity Questionnaire.

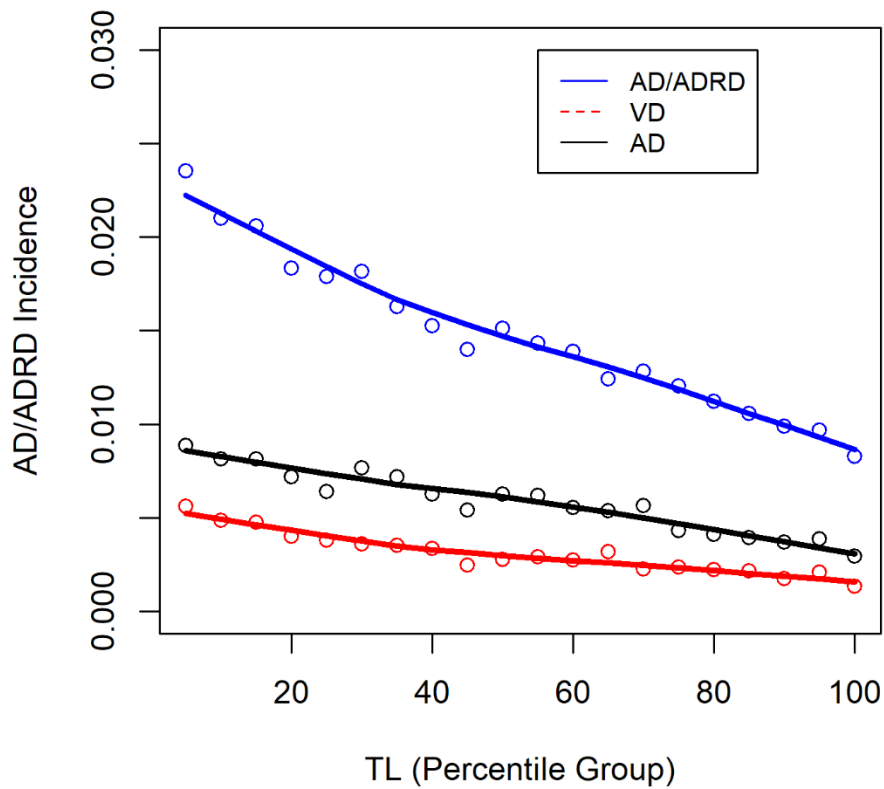

**eFigure 1. Relationship between baseline leukocyte telomere length and incidence of AD/ADRD.**

AD/ADRD incidence calculated for participants with TL between 0-2nd percentile, 3rd-4th percentile, ..., or 98th-100th percentile and similarly for vascular dementia (VD) and Alzheimer's disease or dementia in Alzheimer's disease (AD).



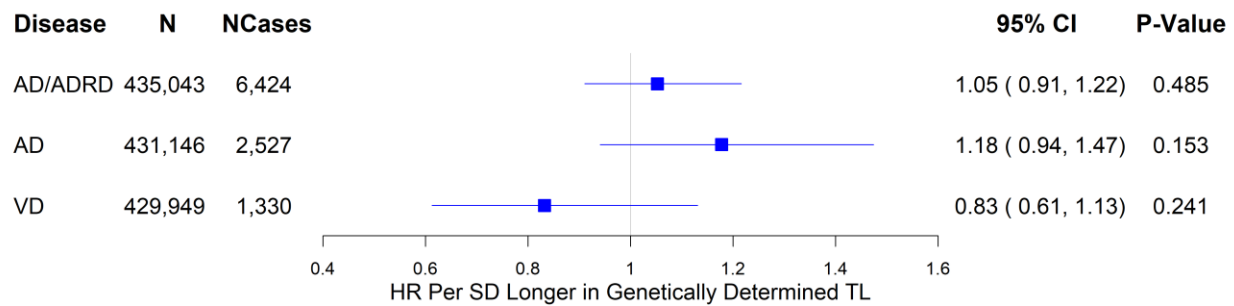

**eFigure 2.** Associations between genetically determined telomere length and AD/ADRD using the Inverse Variance Weighted (IVW) method

\*Significant at the false discovery rate < 0.05 level; AD: Alzheimer’s disease or dementia in Alzheimer’s disease; VD: vascular dementia.

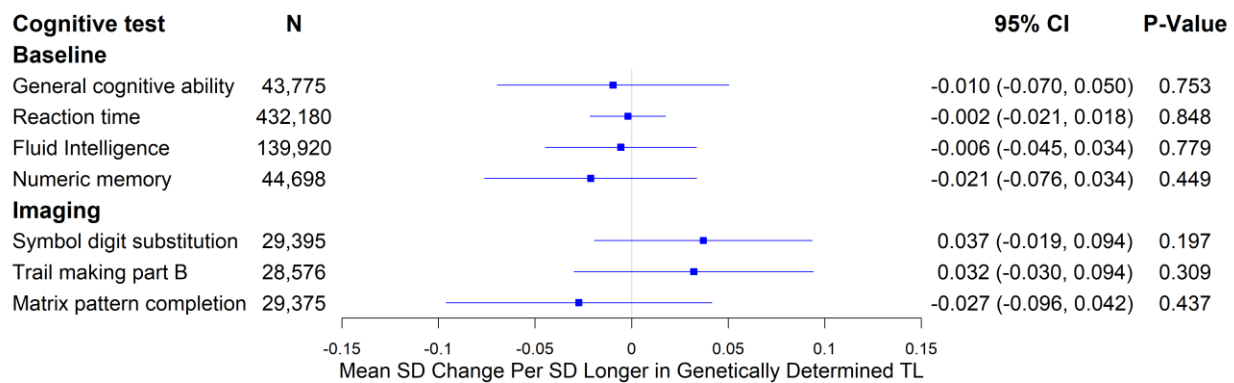

**eFigure 3.** Associations between genetically determined telomere length and cognitive function using the Inverse Variance Weighted (IVW) method

\*Significant at the false discovery rate < 0.05 level.

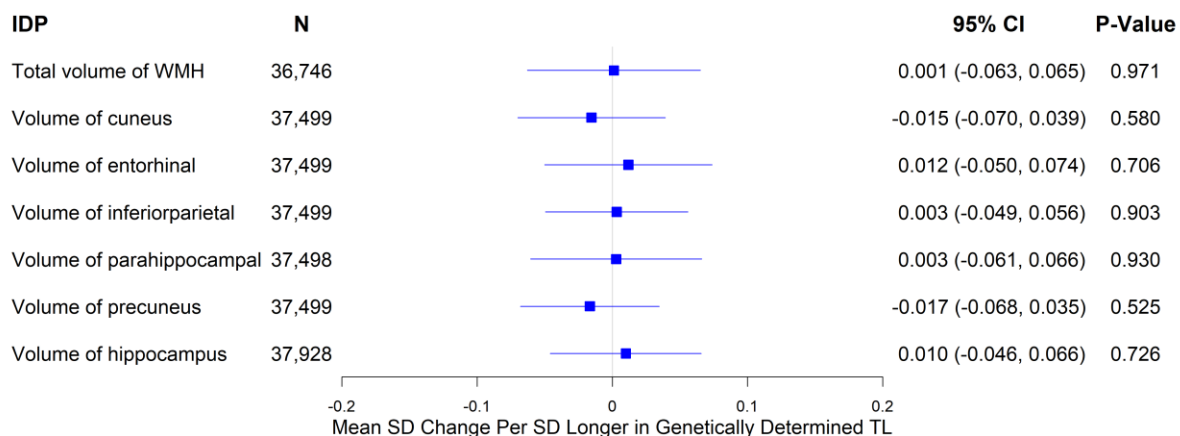

**eFigure 4.** Associations between genetically determined telomere length and volumetric IDPs of AD signatures and white matter hyperintensities (WMH) using the Inverse Variance Weighted (IVW) method

\*Significant at the false discovery rate < 0.05 level.

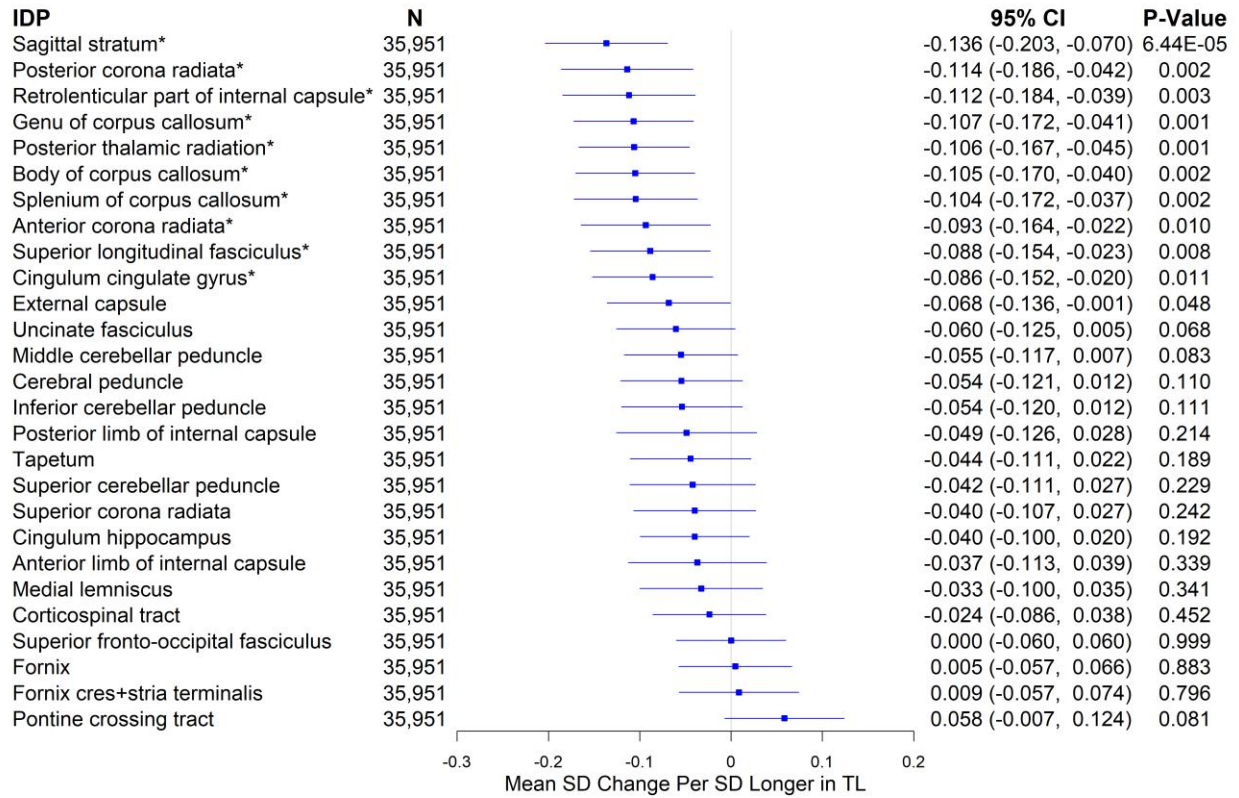

**eFigure 5.** Associations between genetically determined telomere length and weighted-mean fractional anisotropy IDPs using the Inverse Variance Weighted (IVW) method

\*Significant at the false discovery rate < 0.05 level.

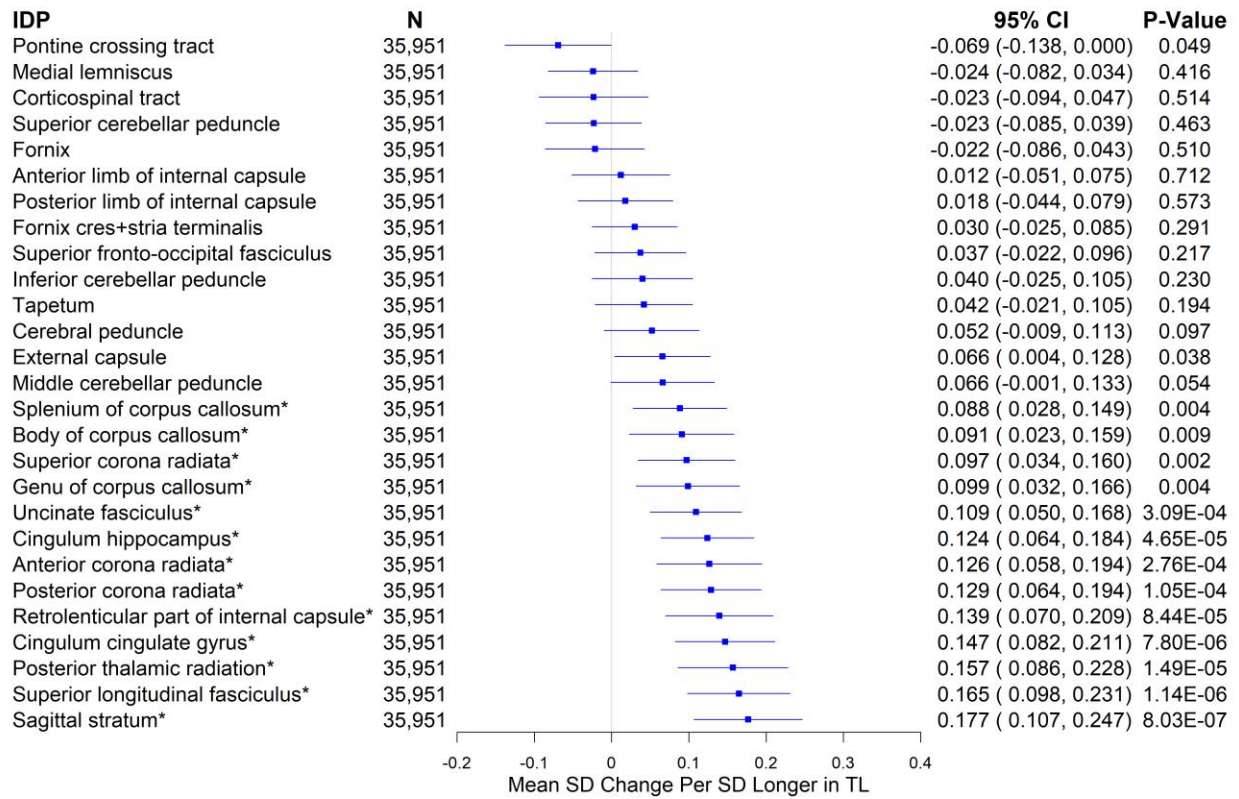

**eFigure 6.** Associations between genetically determined telomere length and weighted-mean mean diffusivity IDPs using the Inverse Variance Weighted (IVW) method

\*Significant at the false discovery rate < 0.05 level.

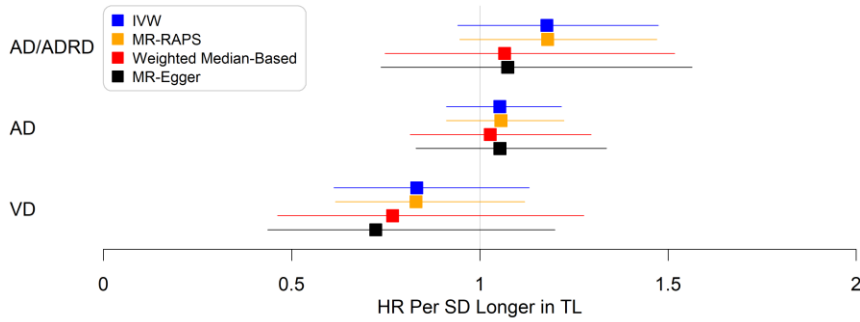

**eFigure 7.** Associations between genetically determined telomere length and AD/ADRD, comparing the primary (IVW: inverse variance weighted) to secondary MR methods (Mendelian randomization robust adjusted profile score (MR-RAPS); weighted median based method; MR-Egger method)

\*Significant at the false discovery rate < 0.05 level using the IVW method; AD: Alzheimer’s disease or dementia in Alzheimer’s disease; VD: vascular dementia.

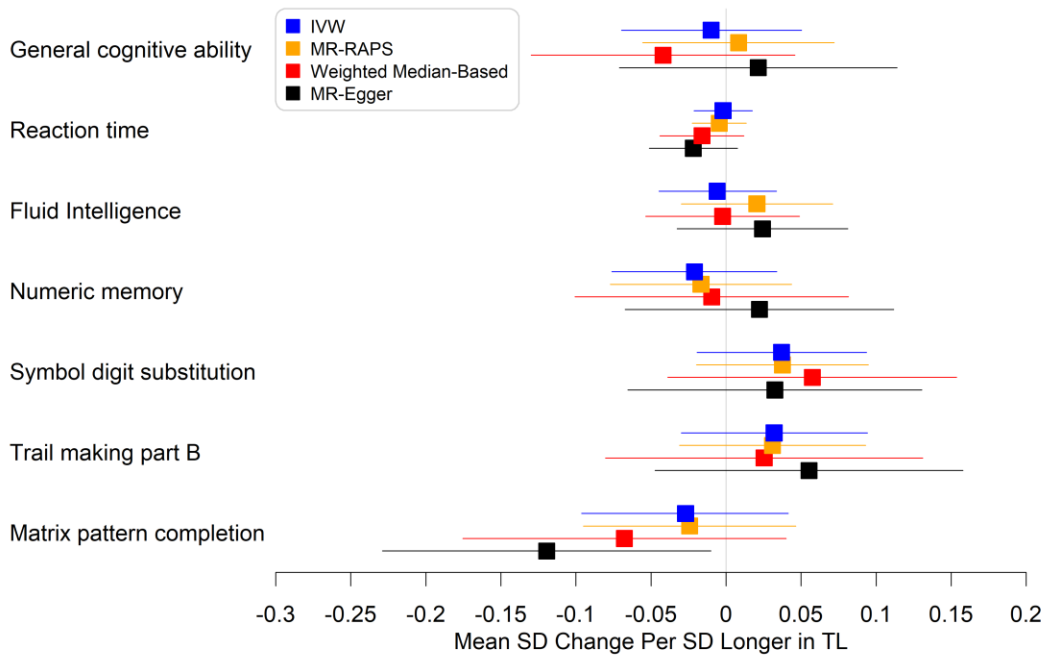

**eFigure 8.** Associations between genetically determined telomere length and cognitive function, comparing the primary (IVW: inverse variance weighted) to secondary MR methods (Mendelian randomization robust adjusted profile score (MR-RAPS); weighted median based method; MR-Egger method)

\*Significant at the false discovery rate < 0.05 level using the IVW method.

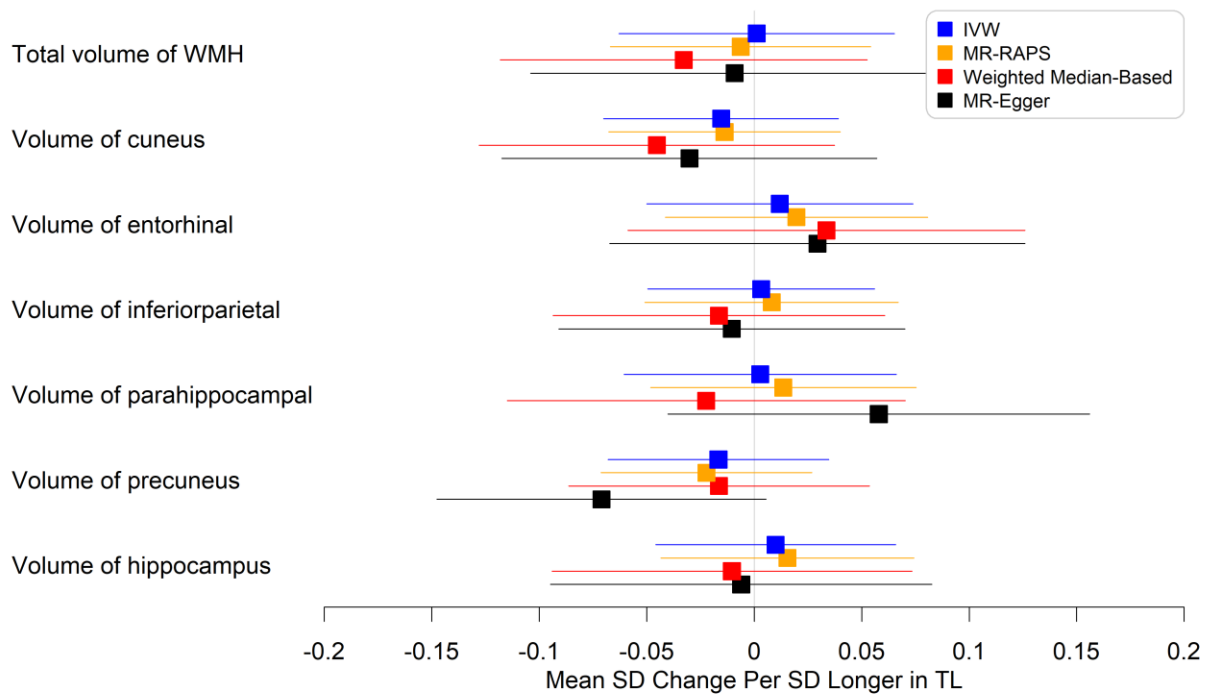

**eFigure 9.** Associations between genetically determined telomere length and volumetric IDPs of AD signatures and white matter hyperintensities (WMH), comparing the primary (IVW: inverse variance weighted) to secondary MR methods (Mendelian randomization robust adjusted profile score (MR-RAPS); weighted median based method; MR-Egger method)

\*Significant at the false discovery rate < 0.05 level using the IVW method.

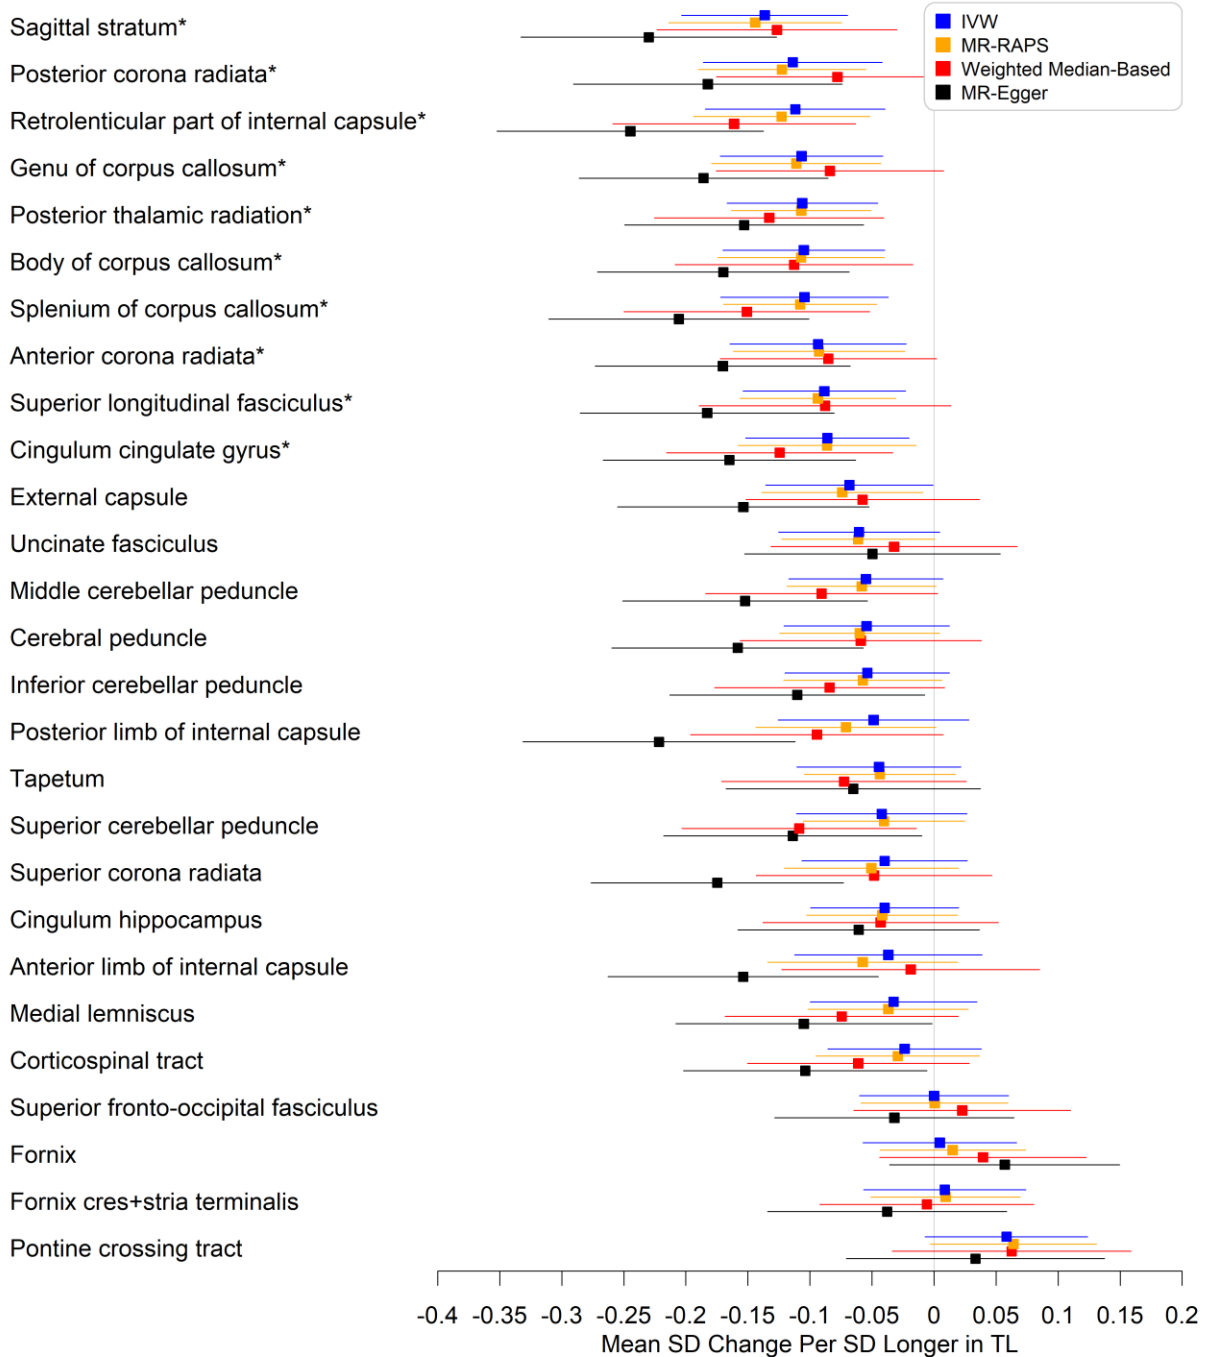

**eFigure 10.** Associations between genetically determined telomere length and weighted-mean fractional anisotropy IDPs, comparing the primary (IVW: inverse variance weighted) to secondary MR methods (Mendelian randomization robust adjusted profile score (MR-RAPS); weighted median based method; MR-Egger method)

\*Significant at the false discovery rate < 0.05 level using the IVW method.

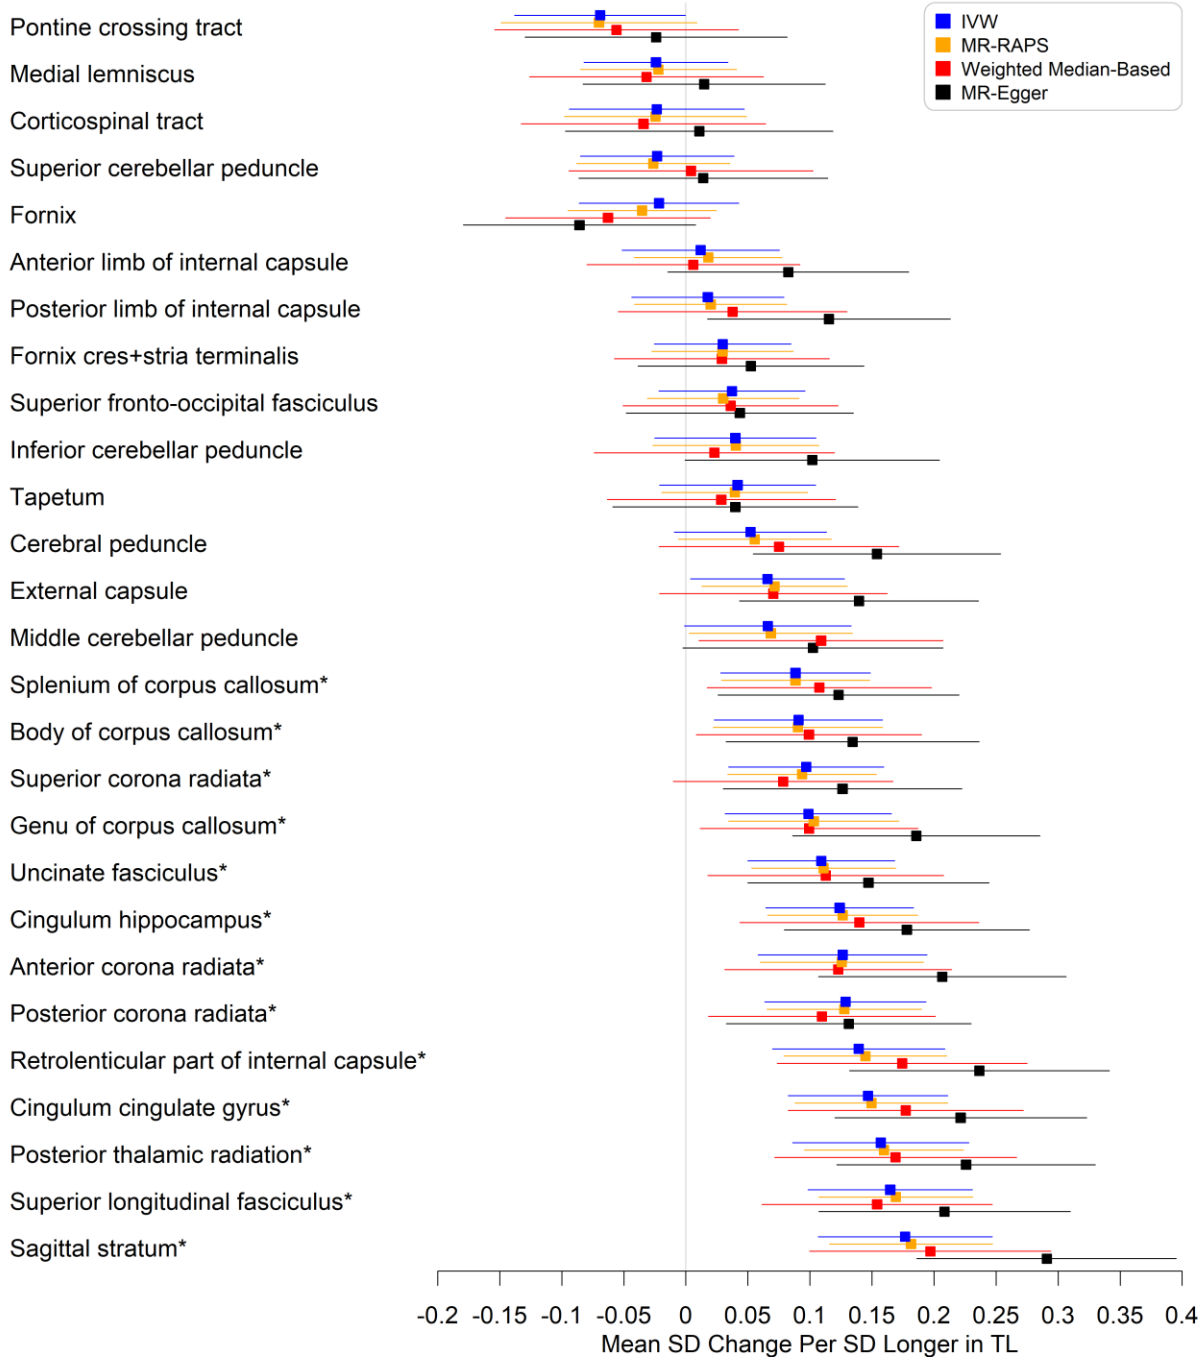

**eFigure 11.** Associations between genetically determined telomere length and weighted-mean mean diffusivity IDPs, comparing the primary (IVW: inverse variance weighted) to secondary MR methods (Mendelian randomization robust adjusted profile score (MR-RAPS); weighted median based method; MR-Egger method)

\*Significant at the false discovery rate < 0.05 level using the IVW method.
